# Supplementary material
Source: publisher figshare collection journal article supplement (https://acs.figshare.com/ndownloader/files/3977101)
Supplement: Supplementary file 1 [file 3977101]

*Supplementary Information for:*

**A Novel Use of Gentamicin in the ROS-Mediated Sensitization of NCI-H460 Lung Cancer Cells to Various Anticancer Agents**

Michael F. Cuccarese<sup>1</sup>, Amit Singh<sup>2</sup>, Mansoor Amiji<sup>2</sup>, George A. O'Doherty<sup>1</sup>

<sup>1</sup>Department of Chemistry and Chemical Biology, Northeastern University, Boston, MA, USA <sup>2</sup>Department of Pharmaceutical Sciences, Northeastern University, Boston, MA, USA

**Figure S1.** SI for figures 1 and 2 showing full dose-response relationship for all drugs with GEN against H460

**Figure S2.** SI for figure 3 showing full dose-response relationship for all drugs with GEN against A549

**Figure S3.** Bradford data for normalization of GSH total content data:

**Figure S4.** Chou-Talalay results for combination index and dose reduction index

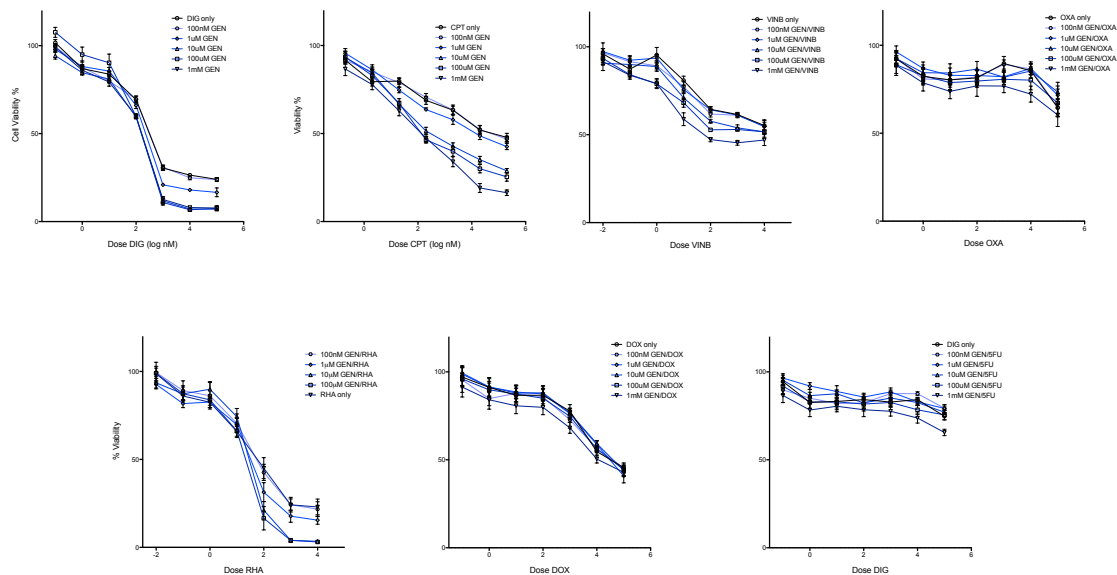

**Figure S1:** H460 cells were seeded in full media in 96-well plates at a density of 5000 cells per well. Drug dilutions were performed in serum-free RPMI-1640 (SFM). After seeding for 18 h, cells were dosed with GEN (5 concentrations, log 10) or SFM for 24 h. Cells were then dosed with an anticancer agent (7 concentrations, log 10) across all GEN concentrations. Plates were then incubated for 48 h (H460) at 37 °C. All treatments were performed in duplicate on each plate and repeated for a total of 3 independent experiments. Cell viability was measured via MTT assay.

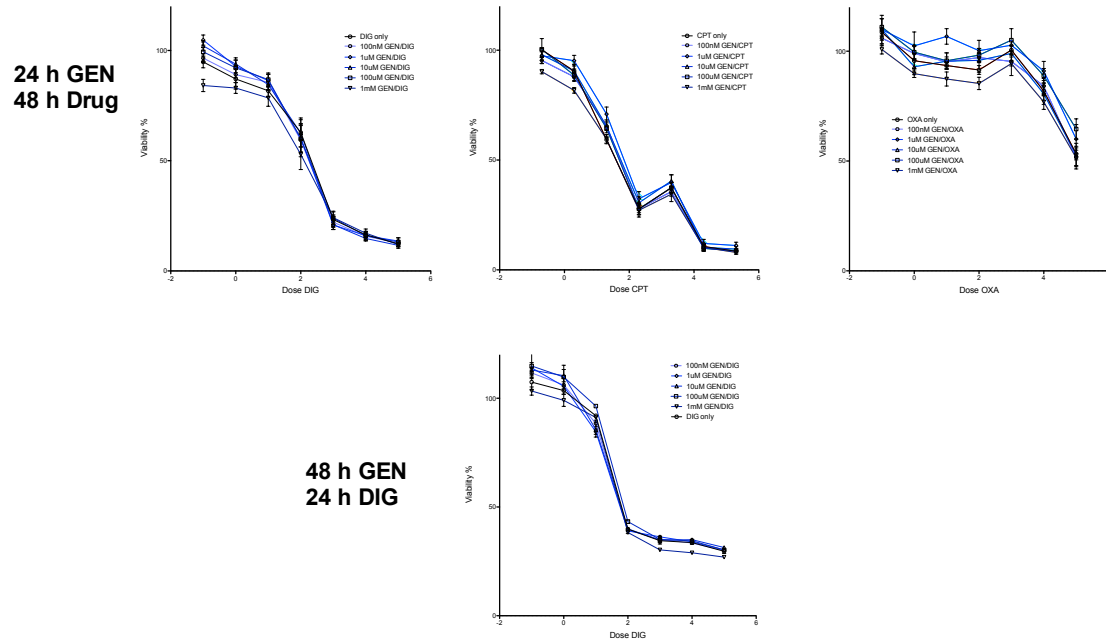

**Figure S2:** A549 cells were seeded in full media in 96-well plates at a density of 5000 cells per well. Drug dilutions were performed in serum-free RPMI-1640 (SFM). After seeding for 18 h, cells were dosed with GEN (5 concentrations, log 10) or SFM for 24 h. Cells were then dosed with an anticancer agent (7 concentrations, log 10) across all GEN concentrations. Plates were then incubated for 48 or 24 h at 37 °C. All treatments were performed in duplicate on each plate and repeated for a total of 3 independent experiments. Cell viability was measured via MTT assay.

| Sample    | $\mu\text{L}$ added | BSA      | Reading  | H460    | A549    |
|-----------|---------------------|----------|----------|---------|---------|
| 0 (Blank) | 0                   | 0        | 0        | 0       | 0       |
| 1         | 2                   | 1.02E-01 | 0.087634 | 0.31638 | 0.16926 |
| 2         | 4                   | 0.18449  | 0.14845  | 0.52500 | 0.34778 |
| 3         | 6                   | 0.25745  | 0.21174  | 0.65837 | 0.49204 |
| 4         | 8                   | 0.32538  | 0.25749  |         |         |
| 5         | 10                  | 0.38262  | 0.37446  |         |         |
| 6         | 12                  | 0.43626  | 0.36404  |         |         |

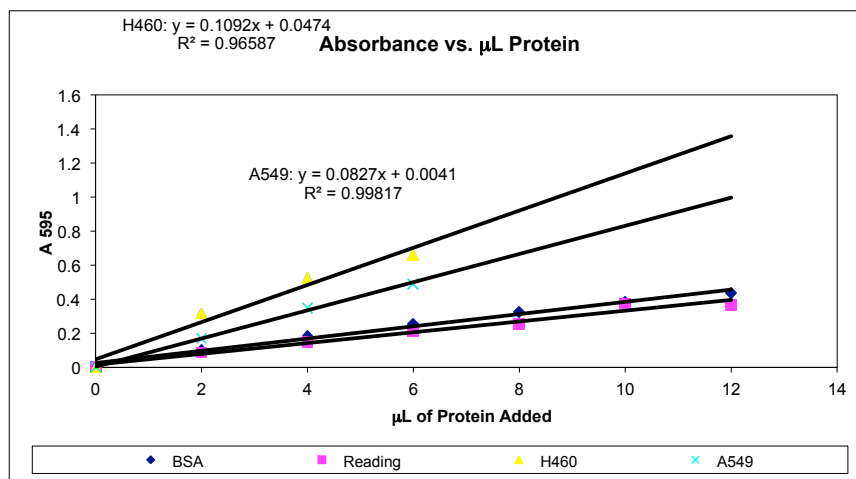

|                    | BSA    | a835    | H460    | A549    |
|--------------------|--------|---------|---------|---------|
| slope              | 0.0359 | 0.0317  | 0.1092  | 0.0827  |
| prot. conc (mg/mL) | 2.5    | 2.20752 | 7.60446 | 5.75905 |

GSH multiplication factor to normalize A549 =  $7.60446/5.75905$

**Figure S3.** 20  $\mu\text{L}$  protein lysate was saved prior to deproteination. A standard Bradford assay with BSA was performed and 3 concentrations of lysate from A549 and H460 were fit to the curve. A multiplication factor was obtained and applied to GSH concentrations to normalize to total protein.

|              |            |          |                           |
|--------------|------------|----------|---------------------------|
| GEN-control  |            |          |                           |
| 10           | 0.04512087 |          |                           |
| 100          | 0.15186228 |          |                           |
| 1000         | 0.18520397 |          |                           |
| 10000        | 0.2413655  |          |                           |
| 100000       | 0.20159742 |          |                           |
| 1000000      | 0.23261723 |          |                           |
| 10000000     | 0.47207563 |          |                           |
| DIG-control  |            |          |                           |
| 0.1          | -0.016581  | DIG      | response GEN              |
| 1            | 0.13053337 |          | 10 0.20102685 100         |
| 10           | 0.16188853 |          | 100 0.33938142 1000       |
| 100          | 0.30610922 |          | 1000 0.88214994 10000     |
| 1000         | 0.69567094 |          | 10000 0.93271456 100000   |
| 10000        | 0.73592984 |          | 100000 0.92278646 1000000 |
| 100000       | 0.75961536 |          |                           |
| CPT-control  |            |          |                           |
| 0.2          | 0.08314558 | CPT      | response GEN              |
| 2            | 0.20566211 |          | 20 0.21055359 100         |
| 20           | 0.20212555 |          | 200 0.3637664 1000        |
| 200          | 0.31179764 |          | 2000 0.57223025 10000     |
| 2000         | 0.36729596 |          | 20000 0.69967119 100000   |
| 20000        | 0.48022989 |          | 200000 0.83621799 1000000 |
| 200000       | 0.52188262 |          |                           |
| VINB-control |            |          |                           |
| 0.1          | 0.04006567 | VINB     | response GEN              |
| 1            | 0.12679205 |          | 10 0.1079921 100          |
| 10           | 0.04697752 |          | 100 0.2431485 1000        |
| 100          | 0.19185957 |          | 1000 0.42281262 10000     |
| 1000         | 0.35566272 |          | 10000 0.47017392 100000   |
| 10000        | 0.3847626  |          | 100000 0.53032037 1000000 |
| 100000       | 0.44792583 |          |                           |
| OXA-control  |            |          |                           |
| 0.1          | 0.07713108 | OXA      | response GEN              |
| 1            | 0.17660383 |          | 10 0.19636327 100         |
| 10           | 0.1964471  |          | 100 0.17199645 1000       |
| 100          | 0.18563585 |          | 1000 0.18110818 10000     |
| 1000         | 0.10367252 |          | 10000 0.19839518 100000   |
| 10000        | 0.14506397 |          | 100000 0.3962095 1000000  |
| 100000       | 0.35413545 |          |                           |
| DOX-control  |            |          |                           |
| 0.01         | 0.0296544  | DOX      | response GEN              |
| 0.1          | 0.08838475 |          | 1 0.12211542 100          |
| 1            | 0.13318455 |          | 10 0.12545432 1000        |
| 10           | 0.13273792 |          | 100 0.23384925 10000      |
| 100          | 0.22317147 |          | 1000 0.43859288 100000    |
| 1000         | 0.45267068 |          | 10000 0.57097308 1000000  |
| 10000        | 0.5447609  |          |                           |
| 5FU-control  |            |          |                           |
| 0.1          | 0.05530177 | 5FU      | response GEN              |
| 1            | 0.17355263 |          | 10 0.17962918 100         |
| 10           | 0.16810843 |          | 100 0.14343102 1000       |
| 100          | 0.15784553 |          | 1000 0.14870497 10000     |
| 1000         | 0.17123482 |          | 10000 0.21569243 100000   |
| 10000        | 0.15759145 |          | 100000 0.34427717 1000000 |
| 100000       | 0.2522089  |          |                           |
| CI           |            |          |                           |
| DIG          | CPT        | VINB     | OXA DOX 5FU               |
| 1.042        | 0.14       | 2.04E+04 | 0.012 2686.589 0.156      |
| 1.111        | 0.012      | 0.108    | 6.828 4074.291 810.194    |
| 0.003        | 0.001      | 0.056    | 16.646 2.118 1486.899     |
| 0.005        | 0          | 0.27     | 11.848 0.457 0.855        |
| 0.077        | 9.37E-06   | 1.143    | 4.28E-07 0.577 3.35E-05   |
| DRI          |            |          |                           |
| DIG          | CPT        | VINB     | OXA DOX 5FU               |
| 0.969        | 7.267      | 3.259    | 535.998 2.151 102.192     |
| 0.9          | 81.919     | 9.288    | 1.363 0.309 0.009         |
| 324.06       | 1820.339   | 17.989   | 0.488 0.478 0.006         |
| 202.477      | 6429.166   | 3.709    | 0.536 2.189 38.288        |
| 12.975       | 1.07E+05   | 0.875    | 3.77E+06 1.732 5.85E+06   |

**Figure S4.** Calcsyn input and output data for all doses. Average cytotoxicity for 3 independent experiments were entered into Calcsyn (Cambridge, UK) to generate a combination index (CI) and dose reduction index (DRI) for each drug/dose combination.
